# Supplementary material
Source: PubMed Central journal article supplement (PMC2746610)

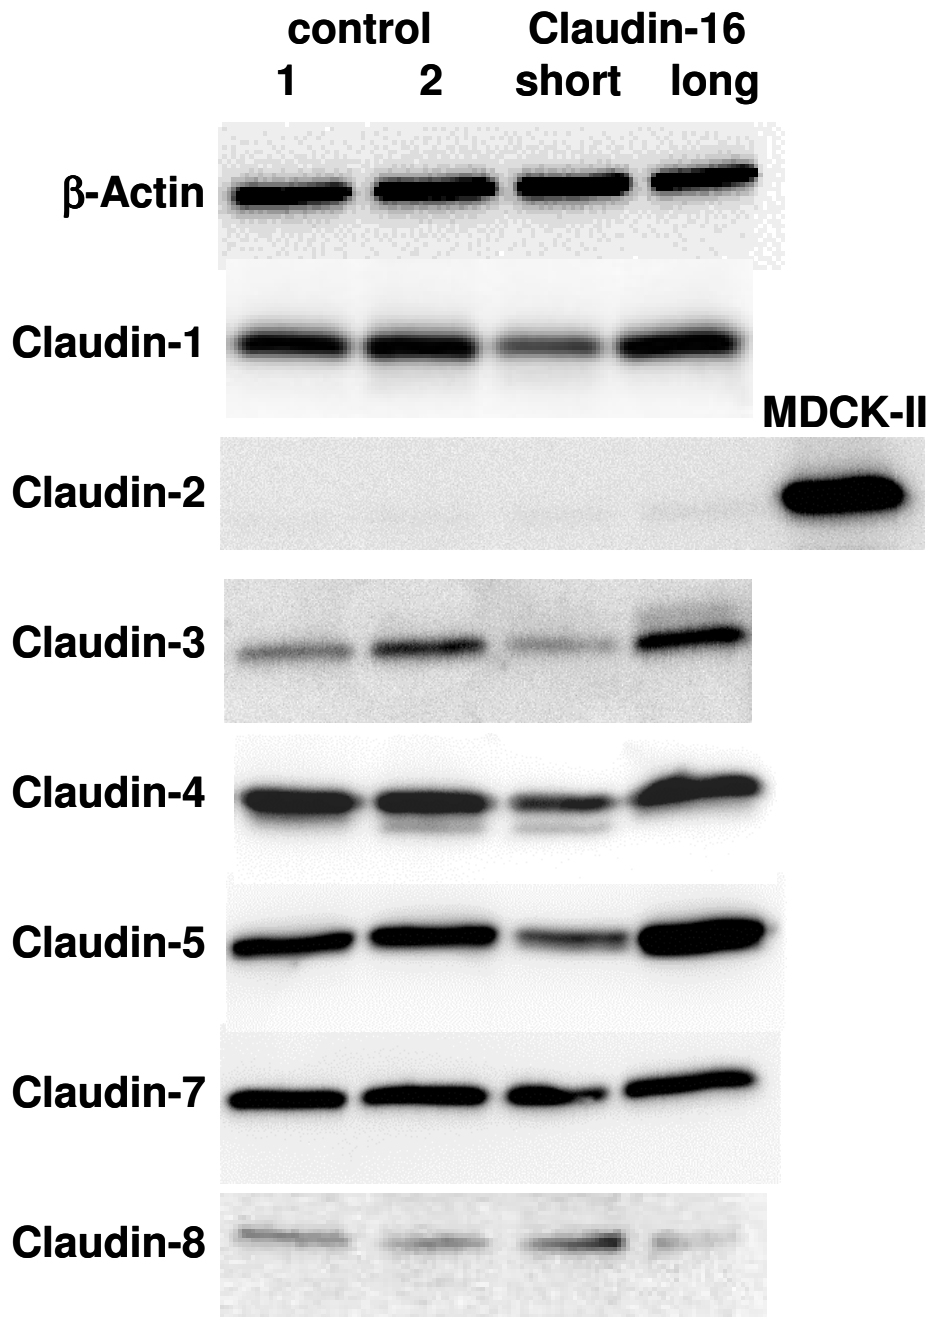

Fig. S1

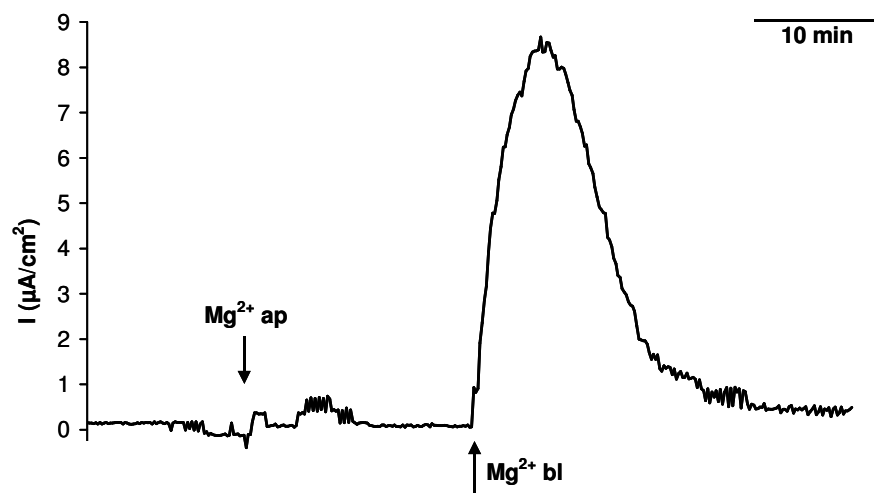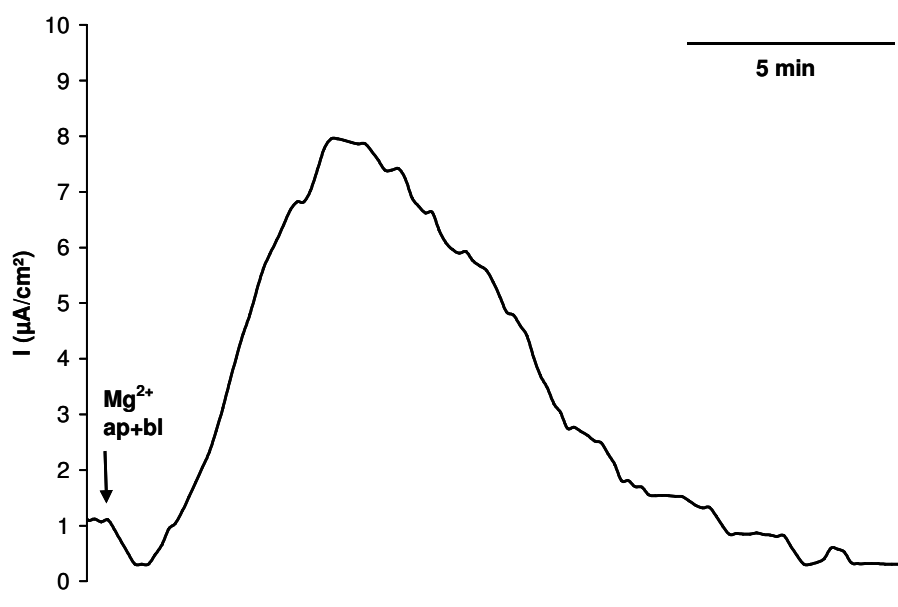

Fig. S2

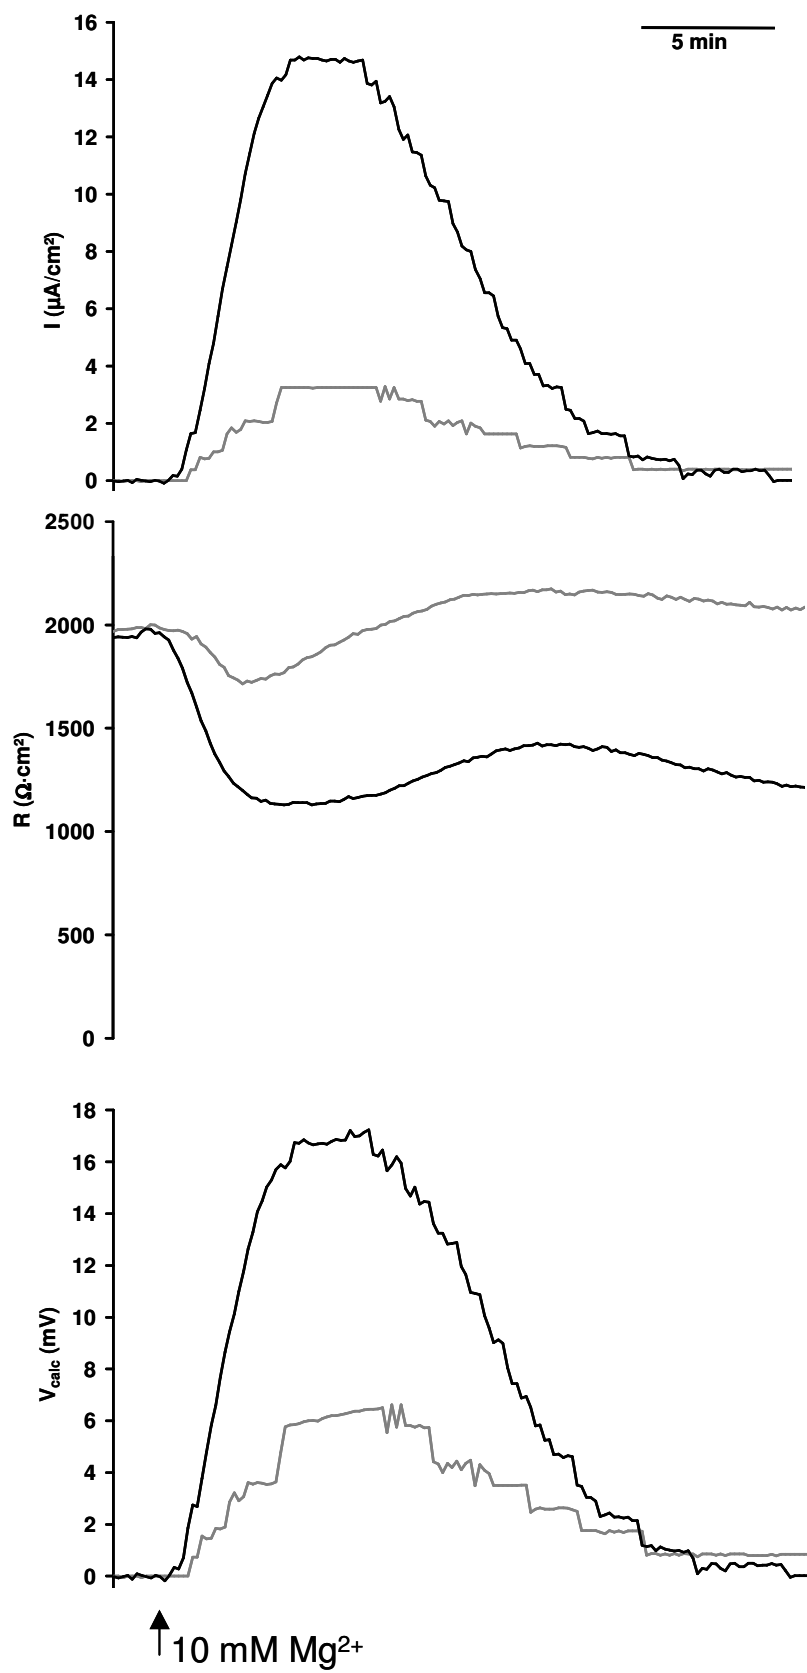

Fig. S3

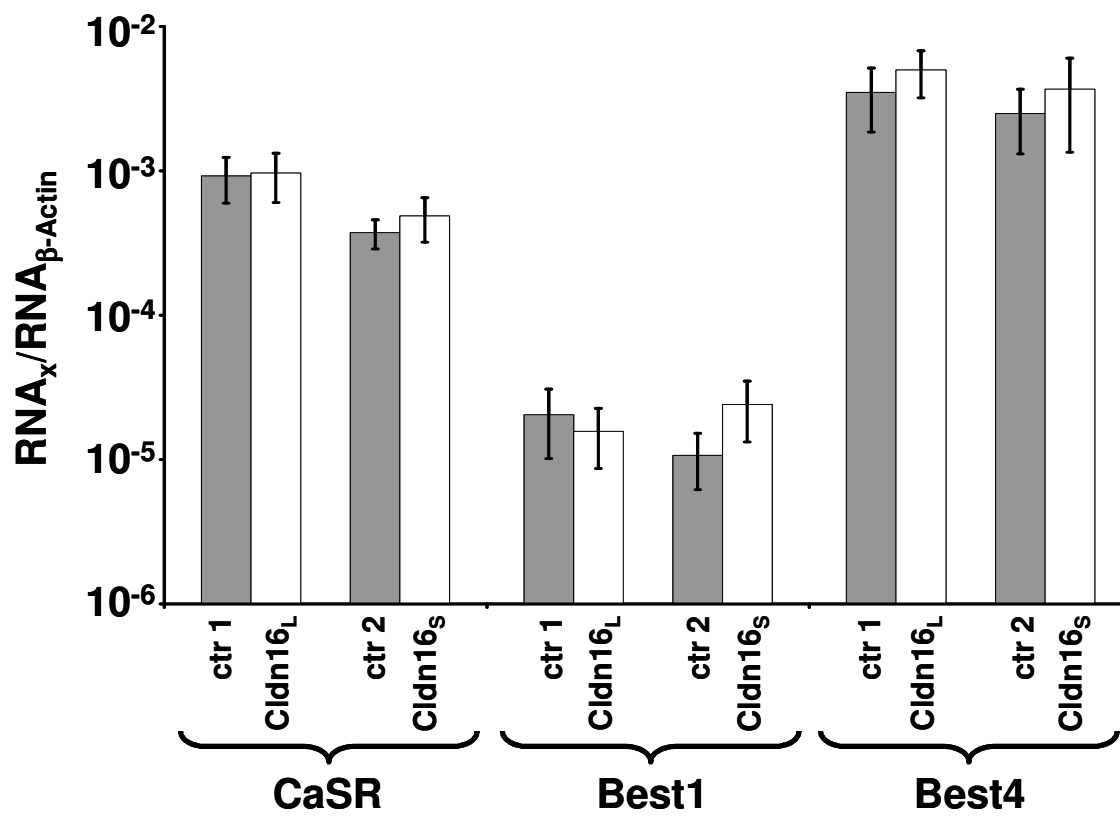

Fig. S4

Supplement: tjp0587-3777-SD1.pdf [file tjp0587-3777-SD1.pdf]
